# Supplementary material for: Measurement properties of the Danish version of the Awareness and Beliefs about Cancer (ABC) measure
Source: Springer Nature journal article supplement (doi:10.1186/s12874-017-0352-2), 2017-04-26
Supplement: MOESM1 [file 12247234]

Additional file. Response distributions for each items of the eight subscales in the Danish ABC measure.

| Anticipated patient interval for healthcare seeking                   |      |                |            |                      |                  |                      |                      |                      |                   |                                       |                               |
|-----------------------------------------------------------------------|------|----------------|------------|----------------------|------------------|----------------------|----------------------|----------------------|-------------------|---------------------------------------|-------------------------------|
|                                                                       | N    | Did not answer | Don't know | As soon as I noticed | Up to 1 week     | Over 1 up to 2 weeks | Over 2 up to 3 weeks | Over 3 up to 4 weeks | More than a month | Go to another healthcare professional | I would not contact my doctor |
| Q5. A persistent cough                                                | 3000 | 0 (0)          | 1.6 (47)   | 6.6 (197)            | 13.0 (389)       | 25.0 (750)           | 16.6 (497)           | 15.7 (470)           | 17.9 (538)        | 0.2 (6)                               | 3.5 (106)                     |
| Q6. Rectal bleeding                                                   | 3000 | 0 (0)          | 0.7 (20)   | 56.6 (1,699)         | 27.8 (833)       | 7.9 (237)            | 2.7 (81)             | 1.7 (52)             | 1.9 (57)          | 0.1 (2)                               | 0.6 (19)                      |
| Q7. Any breast changes                                                | 1659 | 0 (0)          | 0.6 (10)   | 66.7 (1,107)         | 19.4 (321)       | 6.3 (105)            | 2.2 (37)             | 1.9 (32)             | 2.3 (38)          | 0.2 (3)                               | 0.4 (6)                       |
| Q8. Abdominal bloating                                                | 3000 | 0.1 (3)        | 2.3 (70)   | 10.0 (300)           | 21.2 (636)       | 20.9 (627)           | 11.7 (350)           | 10.3 (308)           | 14.1 (422)        | 0.2 (6)                               | 9.3 (278)                     |
| Awareness of cancer symptoms                                          |      |                |            |                      |                  |                      |                      |                      |                   |                                       |                               |
|                                                                       | N    | Did not answer | Don't know | Yes                  | No               |                      |                      |                      |                   |                                       |                               |
| Q9. Unexplained lump or swelling                                      | 3000 | 0 (0)          | 0.8 (25)   | 94.3 (2,829)         | 4.9 (146)        |                      |                      |                      |                   |                                       |                               |
| Q10. Persistent unexplained pain                                      | 3000 | 0 (0)          | 3.4 (101)  | 75.3 (2,258)         | 21.4 (641)       |                      |                      |                      |                   |                                       |                               |
| Q11. Unexplained bleeding                                             | 3000 | 0 (0)          | 4.5 (135)  | 79.5 (2,385)         | 16.0 (480)       |                      |                      |                      |                   |                                       |                               |
| Q12. Persistent cough or hoarseness                                   | 3000 | 0.1 (4)        | 1.6 (49)   | 76.3 (2,290)         | 21.9 (657)       |                      |                      |                      |                   |                                       |                               |
| Q13. Change in bowel or bladder habits                                | 3000 | 0 (1)          | 2.5 (74)   | 80.2 (2,405)         | 17.3 (520)       |                      |                      |                      |                   |                                       |                               |
| Q14. Persistent difficulty in swallowing                              | 3000 | 0 (0)          | 3.4 (101)  | 81.2 (2,437)         | 15.4 (462)       |                      |                      |                      |                   |                                       |                               |
| Q15. Change in the appearance of a mole                               | 3000 | 0.1 (2)        | 0.8 (24)   | 97.2 (2,916)         | 1.9 (58)         |                      |                      |                      |                   |                                       |                               |
| Q16. Sore that does not heal                                          | 3000 | 0 (1)          | 4.5 (134)  | 67.8 (2,034)         | 27.7 (831)       |                      |                      |                      |                   |                                       |                               |
| Q17. Unexplained night sweats                                         | 3000 | 0 (0)          | 8.2 (245)  | 15.6 (467)           | 76.3 (2,288)     |                      |                      |                      |                   |                                       |                               |
| Q18. Unexplained weight loss                                          | 3000 | 0 (0)          | 1.2 (35)   | 91.9 (2,756)         | 7.0 (209)        |                      |                      |                      |                   |                                       |                               |
| Q19. Unexplained tiredness                                            | 3000 | 0 (0)          | 1.8        | 80.1 (2,403)         | 18.1 (543)       |                      |                      |                      |                   |                                       |                               |
| Anticipated barriers for healthcare seeking                           |      |                |            |                      |                  |                      |                      |                      |                   |                                       |                               |
|                                                                       | N    | Did not answer | Don't know | Yes, often           | Yes, sometimes   | No                   |                      |                      |                   |                                       |                               |
| Q24. I would be too embarrassed                                       | 3000 | 0 (1)          | 0 (1)      | 1.2 (36)             | 5.4 (162)        | 93.3 (2,800)         |                      |                      |                   |                                       |                               |
| Q25. I would be worried about wasting the doctor's time               | 3000 | 0 (0)          | 0.2 (5)    | 3.2 (97)             | 11.5 (346)       | 85.1 (2,552)         |                      |                      |                   |                                       |                               |
| Q26. I would be worried about what the doctor might find              | 3000 | 0 (0)          | 0.5 (14)   | 5.0 (150)            | 21.6 (647)       | 73.0 (2,189)         |                      |                      |                   |                                       |                               |
| Q27. I am too busy to make time to go to the doctor                   | 3000 | 0 (1)          | 0.1 (2)    | 6.4 (192)            | 18.0 (539)       | 75.5 (2,266)         |                      |                      |                   |                                       |                               |
| Beliefs about cancer                                                  |      |                |            |                      |                  |                      |                      |                      |                   |                                       |                               |
|                                                                       | N    | Did not answer | Don't know | Strongly disagree    | Tend to disagree | Tend to agree        | Strongly agree       |                      |                   |                                       |                               |
| Q28. People with cancer can expect to continue with normal activities | 3000 | 0 (1)          | 3.0 (91)   | 3.0 (89)             | 10.7 (321)       | 47.5 (1,424)         | 25.8 (1,074)         |                      |                   |                                       |                               |
| Q29. Most cancer treatment is                                         | 3000 | 0.3 (8)        | 9.9 (296)  | 10.7 (321)           | 19.6 (588)       | 36.2 (1,086)         | 23.4 (701)           |                      |                   |                                       |                               |

worse than the cancer itself

|                                                                                         |      |         |          |              |              |              |              |
|-----------------------------------------------------------------------------------------|------|---------|----------|--------------|--------------|--------------|--------------|
| Q30. Not want to know if I have cancer                                                  | 3000 | 0.1 (4) | 2.1 (63) | 77.3 (2,318) | 10.5 (314)   | 4.3 (128)    | 5.8 (173)    |
| Q31. Cancer can often be cured                                                          | 3000 | 0.1 (4) | 1.6 (48) | 3.1 (92)     | 7.6 (228)    | 46.0 (1,379) | 41.6 (1,249) |
| Q32. Going to the doctor as quickly as possible could increase the chances of surviving | 3000 | 0 (0)   | 0.3 (10) | 1.3 (39)     | 1.1 (34)     | 8.9 (266)    | 88.4 (2,651) |
| Q33. A diagnosis of cancer is a death sentence                                          | 3000 | 0.1 (4) | 1.9 (57) | 33.4 (1,003) | 36.1 (1,084) | 22.7 (680)   | 5.7 (172)    |

**Awareness of 5-year survival from cancer**

|                                                                                                          | N    | Did not answer | Don't know | 0        | 1         | 2          | 3          | 4          | 5          | 6          | 7          | 8          | 9          | 10        |
|----------------------------------------------------------------------------------------------------------|------|----------------|------------|----------|-----------|------------|------------|------------|------------|------------|------------|------------|------------|-----------|
| Q34. Out of 10 people diagnosed with bowel cancer, how many do you think would be alive 5 years later?   | 3000 | 0.1 (3)        | 5.0 (151)  | 1.4 (43) | 1.7 (51)  | 6.4 (192)  | 8.2 (245)  | 7.9 (238)  | 29.8 (895) | 10.1 (303) | 11.9 (358) | 12.7 (381) | 3.1 (93)   | 1.6 (47)  |
| Q35. Out of 10 people diagnosed with breast cancer, how many do you think would be alive 5 years later?  | 3000 | 0.1 (3)        | 2.8 (85)   | 0.3 (9)  | 0.3 (10)  | 0.9 (26)   | 1.9 (57)   | 2.2 (67)   | 14.2 (426) | 7.5 (226)  | 17.7 (530) | 31.9 (956) | 15.6 (467) | 4.6 (138) |
| Q36. Out of 10 people diagnosed with ovarian cancer, how many do you think would be alive 5 years later? | 3000 | 0.2 (5)        | 6.3 (189)  | 0.5 (15) | 1.0 (30)  | 2.7 (82)   | 4.1 (124)  | 4.5 (135)  | 22.3 (669) | 7.7 (230)  | 13.6 (409) | 20.6 (617) | 10.6 (317) | 5.9 (178) |
| Q37. Out of 10 people diagnosed with lung cancer, how many do you think would be alive 5 years later?    | 3000 | 0.2 (5)        | 3.1 (93)   | 3.0 (91) | 5.8 (173) | 12.5 (376) | 13.9 (417) | 12.1 (363) | 31.3 (940) | 6.7 (200)  | 5.3 (158)  | 4.9 (146)  | 0.9 (28)   | 0.3 (10)  |

**Beliefs about breast cancer screening**

|                                                                                                         | N    | Did not answer | Don't know | Strongly disagree | Tend to disagree | Tend to agree | Strongly agree |
|---------------------------------------------------------------------------------------------------------|------|----------------|------------|-------------------|------------------|---------------|----------------|
| QM3. So worried about what might be found at breast cancer screening, that I would prefer not to do it. | 1659 | 0.3 (5)        | 0.9 (15)   | 81.5 (1,352)      | 9.5 (157)        | 4.1 (68)      | 3.7 (62)       |
| QM4. Breast cancer screening is only necessary if I have symptoms                                       | 1659 | 0.2 (4)        | 1.2 (19)   | 67.6 (1,121)      | 14.6 (242)       | 8.0 (133)     | 8.4 (140)      |
| QM5. Breast cancer screening could reduce my chances of dying from breast cancer                        | 1659 | 0 (0)          | 1.4 (23)   | 4.5 (74)          | 4.3 (71)         | 18.9 (314)    | 71.0 (1,177)   |

**Beliefs about bowel cancer screening**

|                            | N    | Did not answer | Don't know | Strongly disagree | Tend to disagree | Tend to agree | Strongly agree |
|----------------------------|------|----------------|------------|-------------------|------------------|---------------|----------------|
| QM6. So worried about what | 3000 | 0.2 (7)        | 1.4 (43)   | 75.2 (2,257)      | 12.9 (387)       | 5.9 (176)     | 4.3 (130)      |

might be found at bowel cancer screening, that I would prefer not to do it

|                                                                                |      |         |          |              |            |            |              |
|--------------------------------------------------------------------------------|------|---------|----------|--------------|------------|------------|--------------|
| QM7. Bowel cancer screening is only necessary if I have symptoms               | 3000 | 0.3 (9) | 3.0 (89) | 34.6 (1,038) | 20.3 (608) | 21.8 (654) | 20.1 (602)   |
| QM8. Bowel cancer screening could reduce my chances of dying from bowel cancer | 3000 | 0.3 (8) | 2.8 (84) | 4.3 (129)    | 3.8 (113)  | 24.0 (721) | 64.8 (1,945) |

**Awareness of risk factors for cancer**

|                                                                                                | <b>N</b> | <b>Did not answer</b> | <b>Don't know</b> | <b>Strongly disagree</b> | <b>Tend to disagree</b> | <b>Tend to agree</b> | <b>Strongly agree</b> |
|------------------------------------------------------------------------------------------------|----------|-----------------------|-------------------|--------------------------|-------------------------|----------------------|-----------------------|
| QN1. Smoking                                                                                   | 3000     | 0.1 (2)               | 0.3 (10)          | 1.7 (52)                 | 1.4 (42)                | 10.3 (310)           | 86.1 (2,584)          |
| QN2. Exposure to passive smoking                                                               | 3000     | 0 (1)                 | 1.1 (34)          | 4.1 (123)                | 7.0 (211)               | 38.3 (1,148)         | 49.4 (1,483)          |
| QN3. Drinking more than 1 unit of alcohol a day                                                | 3000     | 0 (0)                 | 3.1 (94)          | 25.3 (758)               | 28.3 (848)              | 28.8 (864)           | 14.5 (436)            |
| QN4. Eating less than 5 portions of fruit and vegetables a day                                 | 3000     | 0 (0)                 | 2.6 (77)          | 22.4 (672)               | 34.0 (1,020)            | 27.9 (837)           | 13.1 (394)            |
| QN5. Eating red or processed meat once a day or more                                           | 3000     | 0 (1)                 | 7.5 (224)         | 15.9 (477)               | 27.0 (811)              | 31.4 (941)           | 18.2 (546)            |
| QN6. Being obese                                                                               | 3000     | 0 (1)                 | 4.1 (124)         | 9.7 (291)                | 19.4 (581)              | 31.5 (945)           | 35.3 (1,058)          |
| QN7. Getting sunburnt more than once as a child                                                | 3000     | 0 (1)                 | 3.0 (90)          | 14.5 (436)               | 17.5 (526)              | 35.3 (1,058)         | 29.6 (889)            |
| QN8. Being over 70 years old                                                                   | 3000     | 0 (1)                 | 3.2 (96)          | 19.7 (591)               | 26.5 (794)              | 30.0 (900)           | 20.6 (618)            |
| QN9. Having a close relative with cancer                                                       | 3000     | 0.1 (2)               | 3.1 (94)          | 12.8 (385)               | 13.8 (414)              | 41.7 (1,252)         | 28.4 (853)            |
| QN10. Infection with HPV, Human Papillomavirus                                                 | 3000     | 0 (0)                 | 68.3 (2,050)      | 3.6 (107)                | 4.5 (134)               | 10.0 (299)           | 13.7 (410)            |
| QN11. Not doing much physical activity                                                         | 3000     | 0 (0)                 | 3.0 (89)          | 12.3 (369)               | 20.2 (605)              | 34.1 (1,022)         | 30.5 (915)            |
| QN12. Using a solarium                                                                         | 3000     | 0 (0)                 | 0.8 (24)          | 1.9 (56)                 | 1.9 (56)                | 14.5 (436)           | 80.9 (2,428)          |
| QN13. Exposure to ionising radiation from, for example, radioactive materials, x-rays or radon | 3000     | 0.1 (2)               | 3.8 (114)         | 2.3 (70)                 | 4.0 (121)               | 18.5 (556)           | 71.2 (2,137)          |
